# Supplementary material for: Evaluating coverage of genome-wide association studies
Source: Springer Nature journal article supplement (doi:10.1038/ng1801), 2006-05-21
Supplement: 41588_2006_BFng1801_MOESM1_ESM.pdf [file 41588_2006_BFng1801_MOESM1_ESM.pdf]

## Supplementary Figure 1

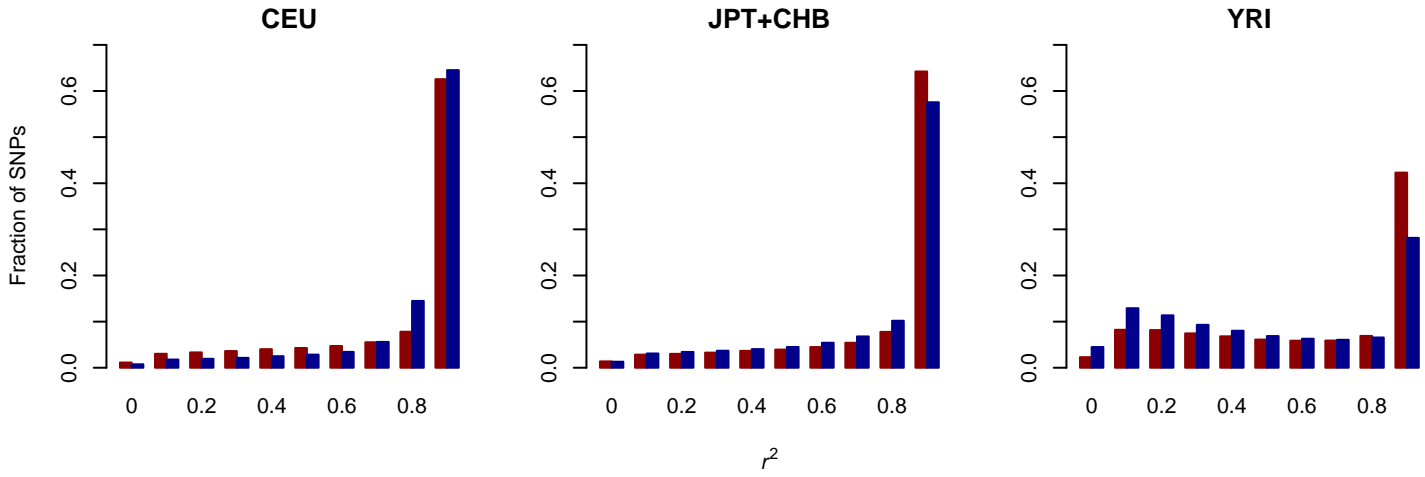

Figure S1: Fraction of SNPs in HapMap Phase II captured by  $r^2$  of at least a given threshold by Illumina 300K (blue) and Affymetrix 500K (red).
