# Supplementary material for: Evaluating coverage of genome-wide association studies
Source: Springer Nature journal article supplement (doi:10.1038/ng1801), 2006-05-21
Supplement: 41588_2006_BFng1801_MOESM2_ESM.pdf [file 41588_2006_BFng1801_MOESM2_ESM.pdf]

## Supplementary Figure 2a

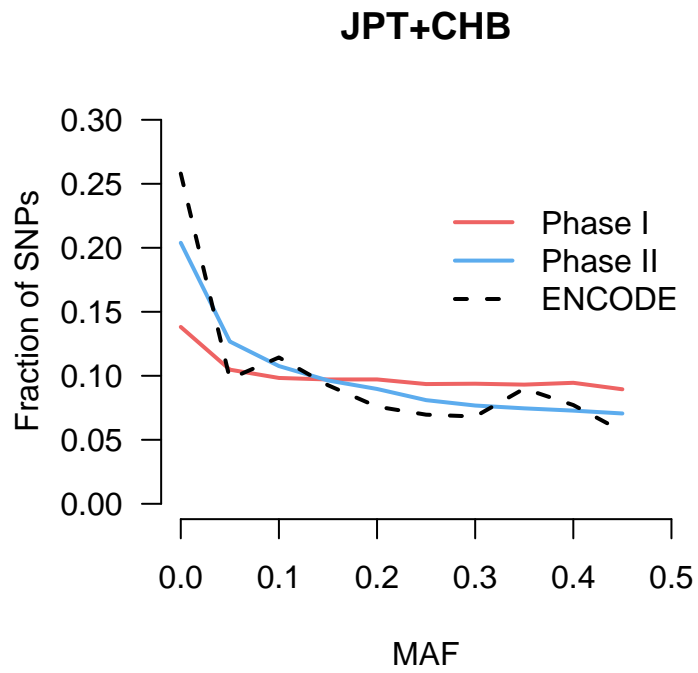

Figure S2a: MAF in JPT+CHB for SNPs in ENCODE, Phase I and Phase II HapMap.

## Supplementary Figure2b

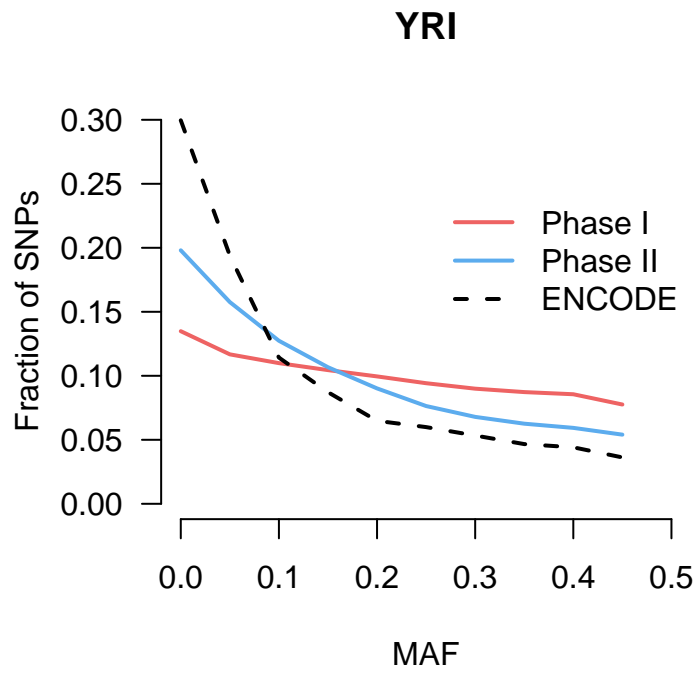

Figure S2b: MAF in YRI for SNPs in ENCODE, Phase I and Phase II HapMap.
